# Supplementary material for: Nanopillar Diffraction Gratings by Two-Photon Lithography
Source: PubMed Central journal article supplement (PMC6836244; doi:10.3390/nano9101495), 2019-10-19
Supplement: nanomaterials-09-01495-s001.pdf [file nanomaterials-09-01495-s001.pdf]

## Supplementary Information

# Nanopillar Diffraction Gratings by Two-Photon Lithography

**Julia Purtov**<sup>1,2,\*</sup>, **Peter Rogin**<sup>1</sup>, **Andreas Verch**<sup>1</sup>, **Villads Egede Johansen**<sup>3</sup>, and **René Hensel**<sup>1,\*</sup>

<sup>1</sup> INM—Leibniz Institute for New Materials, Campus D2 2, 66123 Saarbrücken, Germany; Peter.Rogin@leibniz-inm.de (P.R.); Andreas.Verch@leibniz-inm.de (A.V.)

<sup>2</sup> Department of Materials Science and Engineering, Saarland University, 66123 Saarbrücken, Germany

<sup>3</sup> Department of Chemistry, University of Cambridge, Lensfield Road, Cambridge CB2 1EW, UK; villads.egede.johansen@gmail.com (V.E.J.)

\* Correspondence: julia-purtov@web.de (J.P.); rene.hensel@leibniz-inm.de (R.H.)

**Table S1. Summary of pillar dimensions as a function of the laser power.** Experimental data were obtained from scanning electron microscopy (SEM) micrographs.

| Laser Power [mW] | SEM-investigation |                    |                                 | Fit Sun et al.   |                  |                  | Numerical Simulations |                   |                    |              |               |
|------------------|-------------------|--------------------|---------------------------------|------------------|------------------|------------------|-----------------------|-------------------|--------------------|--------------|---------------|
|                  | Pillar Diam. [nm] | Pillar Height [nm] | Fraction of upright pillars [%] | Voxel Diam. [nm] | Voxel Diam. [nm] | Voxel Diam. [nm] | Voxel Diam. [nm]      | Voxel Height [nm] | Pillar Height [nm] | Aspect ratio | Shrinkage [%] |
| 10               | 120 ± 11          | 333 ± 13           | 29.45                           | 115              | 115              | 144              | 144                   | 531               | 965                | 6.69         | 65.5          |
| 11               | 184 ± 5           | 581 ± 30           | 100                             | 178              | 178              | 230              | 230                   | 781               | 1.09               | 4.74         | 46.72         |
| 12               | 225 ± 7           | 660 ± 14           | 100                             | 221              | 221              | 275              | 275                   | 959               | 1.18               | 4.29         | 44.04         |
| 13               | 230 ± 14          | 822 ± 39           | 100                             | 254              | 254              | 312              | 312                   | 1.113             | 1.257              | 4.02         | 34.58         |
| 14               | 284 ± 7           | 868 ± 28           | 100                             | 281              | 281              | 344              | 344                   | 1.228             | 1.314              | 3.82         | 33.94         |
| 15               | 298 ± 6           | 935 ± 31           | 100                             | 303              | 303              | 370              | 370                   | 1.33              | 1.365              | 3.69         | 31.5          |
| 16               | 313 ± 12          | 1.054 ± 32         | 100                             | 323              | 323              | 392              | 392                   | 1.424             | 1.412              | 3.6          | 25.35         |
| 17               | 336 ± 13          | 1.099 ± 17         | 100                             | 341              | 341              | 413              | 413                   | 1.502             | 1.451              | 3.51         | 24.26         |
| 18               | 358 ± 25          | 1.085 ± 36         | 100                             | 357              | 357              | 433              | 433                   | 1.576             | 1.488              | 3.44         | 27.08         |
| 19               | 376 ± 9           | 1.21 ± 33          | 100                             | 372              | 372              | 449              | 449                   | 1.664             | 1.532              | 3.41         | 21.02         |
| 20               | 379 ± 26          | 1.224 ± 44         | 100                             | 385              | 385              | 464              | 464                   | 1.708             | 1.554              | 3.35         | 21.24         |
| 21               | 411 ± 17          | 1.193 ± 39         | 100                             | 397              | 397              | 478              | 478                   | 1.768             | 1.584              | 3.31         | 24.68         |
| 22               | 410 ± 18          | 1.236 ± 24         | 100                             | 408              | 408              | 491              | 491                   | 1.825             | 1.613              | 3.29         | 23.35         |
| 23               | 427 ± 20          | 1.315 ± 35         | 100                             | 419              | 419              | 503              | 503                   | 1.873             | 1.637              | 3.25         | 19.65         |

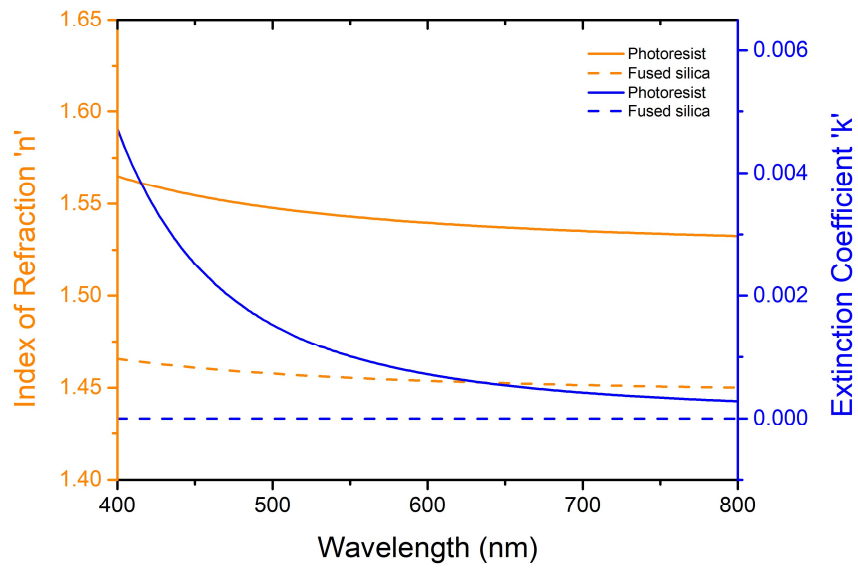

**Figure S1.** Optical properties of the cured photoresist and the fused silica substrate obtained by ellipsometry.

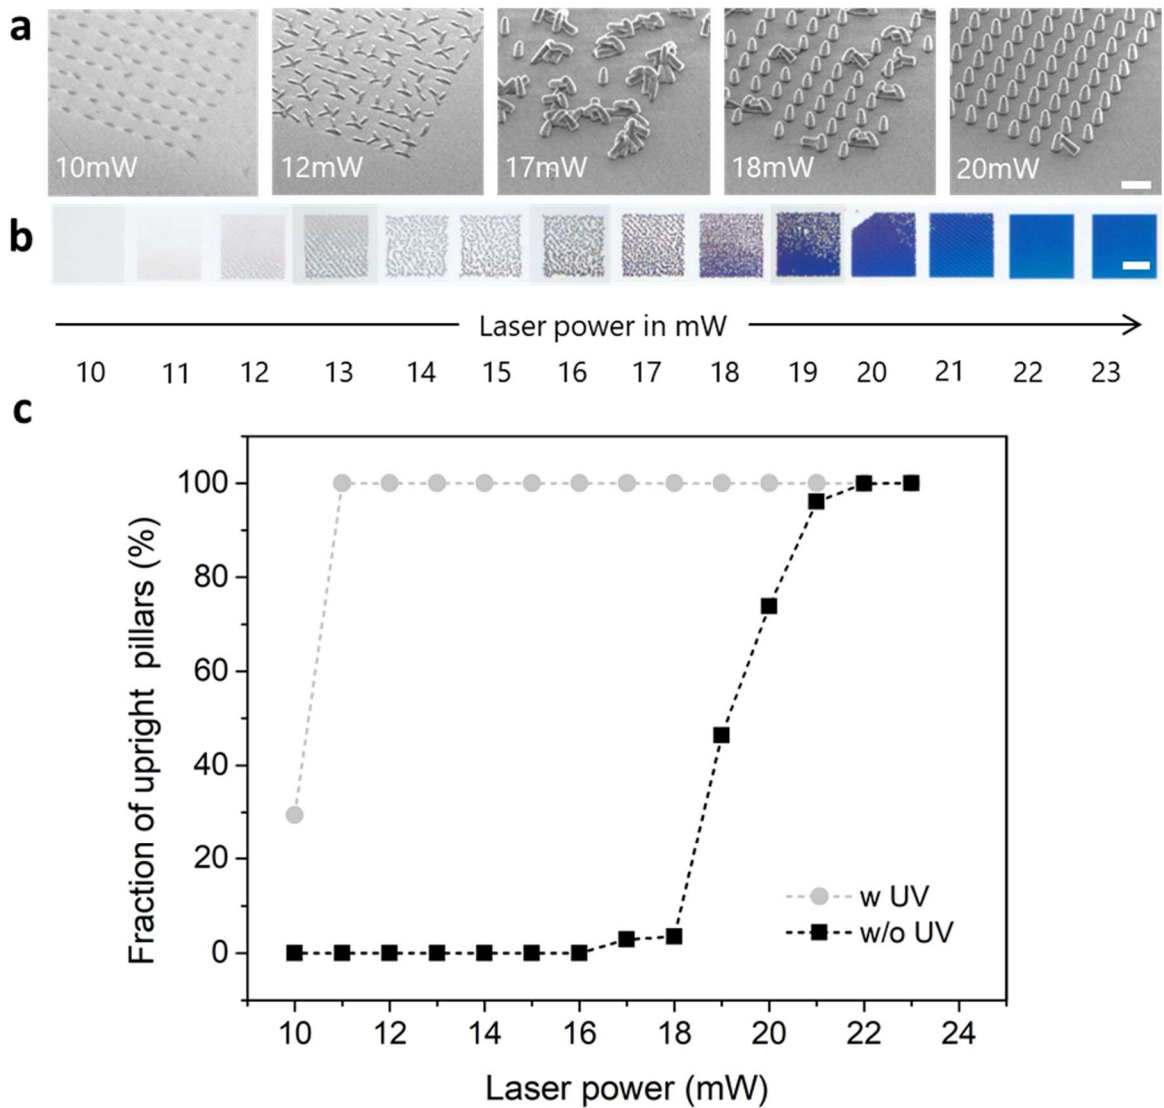

**Figure S2. Optical pillar gratings when fabricated without UV-post-curing. (a)** SEM-micrographs. Scale bar is 1  $\mu\text{m}$ . **(b)** Optical micrographs of 50x50  $\mu\text{m}$  nanopillar gratings on a fused silica substrate. Scale bar is 25  $\mu\text{m}$ . **(c)** Fraction of upright pillars without (black squares) and with additional cross-linking (grey circles). Dotted lines are added to guide the eyes.
